# Supplementary material for: Fluoride-Induced Oxidative Stress in Non-Skeletal Tissues: A Systematic Review and Meta-Analysis
Source: Research Square preprint supplement (doi:10.21203/rs.3.rs-2681038/v1), 2023-03-14
Supplement: Supplementary file 1 [file 905e03c2f6921440e56179e4.docx]

**Table 1: Characteristics of included studies**

| Author | Year | Species/  strain | Animal sex | Age | Weight | Sample Source | Animal Number:  Control/Intervention | Fluoride exposure period | Oxidative Stress Biomarkers |
| --- | --- | --- | --- | --- | --- | --- | --- | --- | --- |
| Afolabi, et al. 29 | 2013 | Rats | Male | 9 - 10 weeks | Average 120g | Blood, Liver | 8/8 | 30-90 days | MDA |
| Bhatnagar, et al. 23 | 2006 | Mice | Female | 1 month | 25 ± 5g | Brain, Liver, | 10/15 | 30 days | SOD, CAT, MDA |
| Chouhan & Flora27 | 2008 | Rats | Male | Adult | 100-120g | Blood, Liver, Kidney, Brain | 6/6 | 30-90 days | ROS, GSH |
| Chouhan, et al.21 | 2010 | Rats | Male | Adult | 100-120g | Blood, liver, kidney, brain | 6/6 | 30-90 days | GSH, ROS |
| Deng, et al.30 | 2014 | Avian Broiler Chickens | N/A | 1 day old | N/A | Blood | 5/5 | 30-90 days | SOD, MDA, GSH-PX, GSH, CAT* |
| Dubey, et al.31 | 2013 | Rats | Male/female | Adult | 150-200g | Liver | 6/6 | < 30 days | SOD, GSH, CAT, MDA |
| Flora, et al.32 | 2009 | Mice | Male | Adult | 25± 5 g | Brain | 5/5 | 30-90 days | ROS, GPx, CAT, SOD, TBARS, GST |
| Flora, et al.33 | 2012 | Mice | Male | Adult | Appx 30g | Blood, Brain, Liver | 5/5 | > 90 days | ROS, GSH, SOD GPx, CAT, TBARS |
| Guo, et al.34 | 2003 | Rats | Male/ Female | 4 weeks old | 90-100 g | Liver | 8/8 | >90 days | MDA, SOD, GSH-Px |
| He & Chen35 | 2006 | Rats | Male | N/A | 80-120 g | Liver | 5/5 | < 30 days | ROS, MDA, GSH |
| Inkielewicz & Czarnowski36 | 2008 | Rats | Male | Adult | 189 ± 6.9 g | Blood, Brain, Kidney, Liver | 6/6 | 30- 90 days | GSH, GPx, TBARS, CAT |
| Manivannan, et al.37 | 2013 | Mice | Male | Adult (8-12 weeks old) | 25–30 g | Liver | 6/6 | 30 days | MDA, GST, GSH, CAT |
| Khan, et al. 38 | 2018 | Rats | Male/Female | N/A | 150–200 g | Brain | 6/6 | < 30 days | GST, CAT, SOD, MDA |
| Kinawy39 | 2019 | Rats | Male | Pups | N/A | Brain | 8/8 | 30-90 days | MDA, GSH, NO |
| Liu, et al.40 | 1999 | Rats | N/A | N/A | 140-160 g | Liver, Kidney | 14/14 | > 90 days | MDA, SOD, GSH-Px, |
| Lopes, et al.41 | 2020 | Mice | Male | 21 days old | 10 g ± 5 g | Brain | 10/10 | 30-90 days | MDA, NO |
| Mittal & Flora42 | 2006 | Mice | Male | Adult | Appx 30 g | Blood, Liver, Kidney | 5/5 | 30-90 days | GSH, TBARS, ROS, GPx, SOD, CAT |
| Narayanaswamy & Piler43 | 2010 | Rats | N/A | Pups | N/A | Brain | 6/6 | 30-90 days | MDA, CAT, SOD, GSH-Px |
| Oyagbemi, et al.44 | 2017 | Rats | Male | Adult | 125–175 g | Kidney, heart | 10/10 | < 30 days | MDA, SOD, CAT, GSH, GPx, NO, GST |
| Panneerselvam, et al.45 | 2015 | Rats | Male | 3 months, 2 weeks old | 130–150 g | Heart | 6/6 | < 30 days | ROS, LPO, NO, GSH, GPx, SOD, CAT, GST |
| Qin, et al 46 | 2015 | Rats | Male/Female | N/A | 90-120g | Kidney | 10/10 | >90 days | MDA |
| Quadri, et al47 | 2018 | Rats | Male | 75 days old | N/A | Heart | 6/6 | 30-90 days | TBARS, SOD, CAT |
| Ranjan, et al48 | 2009 | New Zealand white Rabbits | Male | 4-6 weeks old | 600 - 800 g | Liver, Kidney, Blood | 6/6 | 90 days | LPO, SOD, CAT |
| Reddy, et al49 | 2014 | Rats | Male | 4 months | 150-200g | Brain, Blood | 6/6 | 90 days | MDA, CAT, SOD, GPx |
| Shanthakumari, et al. 50 | 2004 | Rats | Male | N/A | 120–160 g | Liver, Kidney | 6/6 | >90 days | TBARS, SOD, CAT, GSH, GPx, |

**Table 1(continued)**

| Author | Year | Species/strain | Animal sex | Age | Weight | Tissue/Organ | Animal Number:  Control/Intervention | Fluoride exposure period | Oxidative Stress Biomarkers |
| --- | --- | --- | --- | --- | --- | --- | --- | --- | --- |
| Shivarajashankara, et al51 | 2002 | Rats | N/A | Pups | N/A | Brain | 15/9 | 30-90 days | MDA, GSH, GST, GSH-Px, |
| Zhan, et al52 | 2005 | Pigs | Male (barrows) | 50-day-old | Appx 17 kg | Liver, Kidney, Blood | 8/8 | 30-90 days | MDA, NO, SOD, CAT, GSH-Px |
| Zhang, et al53 | 2013 | Rats | Male | 8-week-old | 195–210 g | Kidney, Liver | 6/6 | 30-90 days | MDA. SOD |
| Banala & Karnati25 | 2015 | Rats | N/A | Pups | N/A | Brain, Blood | 5/5 | 30-90 days | SOD, LPO |
| Bartos, et al54 | 2018 | Rats | Female | Pups | N/A | Brain | 5/5 | >90 days | MDA, CAT, GPx |
| Bo, et al55 | 2018 | Bufo gargarizans | N/A | larvae | N/A | Liver | 3/3 | < 30 days | SOD, GPx |
| Bouaziz, et al56 | 2007 | Mice | Female | Adult | N/A | Kidney, liver, blood | 6/6 | <30 days | SOD, GSH-Px, TBARS |
| Campos-Pereira, et al57 | 2017 | Rats | Male | Adult | 180-200g | Liver | 10/10 | 30-90 days | CAT, MDA, SOD, GST, |
| Cao, et al58 | 2013 | Cyprinus carpio | N/A | Juveniles | 15.8 ± 0.24 g | Liver | 18/18 | 90 days | MDA, SOD, GSH |
| Chen, et al59 | 2015 | Cyprinus carpio | N/A | Juveniles | 15.8 ± 0.24 g | Kidney | 18/18 | 90 days | MDA, SOD, GSH |
| Dec, et al60 | 2020 | Rats | N/A | Pups | N/A | Brain | 6/6 | >90 days | CAT, SOD, GSH, GPx, |
| Gao, et al61 | 2009 | Rats | Male/Female | Young adult | 90–120 g | Brain | 8/8 | >90 days | MDA |
| Inkielewicz-Stȩpniak &  Knap62 | 2012 | Rats | Male/Female | 6 weeks old | Appx 220 g (M) and Appx 170 g (F) | Liver, Kidney | 12/12 | 30-90 days | TBARS, NO, GSH |
| Kaur, et al63 | 2009 | Rats | Female | Adult | 175–200g | Brain | 8/8 | 30-90 days | MDA, SOD |
| Lu, et al64 | 2017 | Mice | N/A | 4-week-old | N/A | Liver | 8/8 | 30-90 days | GST, GSH-Px, CAT, SOD, ROS |
| Luo, et al65 | 2017 | Mice | N/A | 4-week-old | N/A | Kidney | 8/8 | 30-90 days | ROS, MDA, CAT, SOD, GSH, CAT, GSH-Px |
| Miranda, et al19 | 2018 | Mice | Male | 21 days | 30±10 g | Blood | 10/10 | 30-90 days | TBARS, NO, SOD, CAT, GSH |
| Song, et al 66 | 2013 | Rats | Male/Female | 21 days | 120±5 g | Kidney | 12/12 | 30-90 days | CAT, SOD, ROS |
| Wang, et al67 | 2019 | Bufo gargarizans | N/A | Gosner stage (Gs) 26 Larvae | N/A | Liver | 3/3 | 30-90 days | SOD, GPx |
| Zhan, et al68 | 2006 | Pigs | Male (barrows) |  | Appx 17 kgs | Liver | 8/8 | 30-90 days | MDA |
| Zhong, et al69 | 2021 | Rats | Male | 3-weeks-old | N/A | Blood | 10/10 | >90 days | MDA |
| Vani & Reddy70 | 2000 | Mice | Female | Adult | 30 ± 2 g | Brain | 6/6 | < 30 days | CAT, SOD, GST |
| Akinrinade, et al71 | 2015 | Rats | Male | Adult | 180 -250 g | Brain, Blood | 5/5 | < 30 days | SOD, MDA |
| Samir72 | 2017 | Rats | Female | Adults | 180–230 g | Liver | 4/4 | 30-90 days | MDA, GSH, GST |
| Flora, et al73 | 2011 | Rats | Male | Adults | 180–200 g | Blood | 5/5 | N/A | ROS, GSH |
| Chattopadhyay, et al74 | 2011 | Mice | Male | 8-week-old | 25–30 g | Liver, Kidney | 5/5 | 90 days | MDA, GST, GSH |

**Table 1(continued)**

| Author | Year | Species/strain | Animal sex | Age | Weight | Tissue/Organ | Animal Number:  Control/Intervention | Fluoride exposure period | Oxidative Stress Biomarkers |
| --- | --- | --- | --- | --- | --- | --- | --- | --- | --- |
| Mukhopadhyay, et al75 | 2015 | Zebrafish | Female | Adult | 0.7 ± 0.01 g | Liver | 30/30 | 90 days | ROS, GSH, MDA, CAT, SOD, GST |
| Bartos, et al76 | 2019 | Rats | Male | Pups | N/A | Brain | 5/5 | 30-90 days | CAT, GPx, MDA |
| Baba, et al77 | 2016 | Rats | N/A | N/A | 175 ± 25 g | Kidney | 6/6 | < 30 days | CAT, SOD, GSH-Px, MDA |
| Mondal, et al78 | 2021 | Zebrafish | Female | N/A | 0.25-0.30 g | Brain | 30/30 | 30-90 days | CAT, GSH, MDA |
| Zhou, et al. 79 | 2015 | Mice | Female | 3-weeks old | N/A | Blood/Liver | 36/36 | 30-90 days | ROS, SOD, GSH-Px, MDA, CAT |
| Inkielewicz & Czarnowski. 80 | 2010 | Rats | Male | 6-weeks old | Appx 180 g | Blood, Brain, Kidney, Liver | 6/6 | < 30 days | TBARS |
| Khan, et al.81 | 2022 | Rats | Female | 3-month-old | 140±20 g | Liver | 5/5 | 90 days | NO, LPO, GSH |
| Sharma, et al. 82 | 2022 | Rats | Male | 12–14 weeks | 175–200 g | Blood, Brain | 6/6 | >90 days | GSH, SOD, CAT, GPx |
| Dong, et al.83 | 2020 | Rats | Male | Pups | 200–250 g | Liver | 6/6 | >90 days | MDA, CAT, GST |
| Tian, et al. 84 | 2019 | Rats | Male | Pups | 200–250 g | Kidney | 6/6 | >90 days | GSH, GSH-Px, CAT, SOD, MDA |
| Morales-González, et al. 85 | 2010 | Rats | Male | N/A | 240 ± 7 g | Blood | 5/5 | 30-90 days | MDA, SOD, GSH-Px, CAT |

*SOD:superoxide dismutase; GPx/GSH-Px: glutathione peroxidase; CAT: catalase; GST: glutathione-s-transferase; GSH: glutathione ROS: reactive oxygen species; LPO: lipid peroxidation; MDA: malondialdehyde; TBARS: thiobarbituric acid reactive substances; NO: nitric oxide.*

*N.B: Total number of study animals was used in studies that did not report number of animals for each experiment*

**Table 2: Results of the meta-regression analysis**

|  | Coefficient | SE | Z value | *P* value | 95% CI |
| --- | --- | --- | --- | --- | --- |
| SOD |  |  |  |  |  |
| - Intervention period (Reference < 30 days) |  |  |  |  |  |
| - 30-90 days | -1.4080 | 1.6379 | -0.8596 | 0.3900 | -4.6182 - 1.8023 |
| - > 90 days | -0.0020 | 2.0681 | -0.0010 | 0.9992 | -4.0554 - 4.0515 |
| - Animal species (Reference mice) |  |  |  |  |  |
| - Rats | 2.3968 | 1.5563 | 1.5400 | 0.1236 | -0.6536 - 5.4472 |
| - Others | 2.3896 | 1.8342 | 1.3028 | 0.1926 | -1.2054 - 5.9846 |
| - Sample source (Reference blood) |  |  |  |  |  |
| - Kidney | -1.8243 | 1.9534 | -0.9339 | 0.3503 | -5.6529 - 2.0042 |
| - Liver | -3.2729 | 1.8067 | -1.8115 | 0.0701 | -6.8140 - 0.2682 |
| - Heart | -4.0347 | 3.0881 | -1.3065 | 0.1914 | -10.0873 - 2.0178 |
| - Brain | -4.2570 | 1.9466 | -2.1869 | 0.0288 | -8.0724 - -0.4417 |
| CAT |  |  |  |  |  |
| - Intervention period (Reference < 30 days) |  |  |  |  |  |
| - 30-90 days | 0.1844 | 1.8160 | 0.1015 | 0.9191 | -3.3750 - 3.7437 |
| - > 90 days | 0.6915 | 2.1564 | 0.3207 | 0.7484 | -3.5349 - 4.9180 |
| - Animal species (Reference mice) |  |  |  |  |  |
| - Rats | 1.2902 | 1.3501 | 0.9556 | 0.3393 | -1.3560 - 3.9364 |
| - Others | 1.6203 | 1.9266 | 0.8410 | 0.4003 | -2.1557 - 5.3963 |
| - Sample source (Reference blood) |  |  |  |  |  |
| - Kidney | 0.5064 | 1.9800 | 0.2558 | 0.7981 | -3.3743 - 4.3871 |
| - Liver | -2.0595 | 1.8681 | -1.1025 | 0.2703 | -5.7209 - 1.6019 |
| - Heart | -2.2404 | 2.9927 | -0.7486 | 0.4541 | -8.1060 - 3.6251 |
| - Brain | -0.4309 | 1.8362 | -0.2347 | 0.8145 | -4.0299 - 3.1680 |
| GSH-Px |  |  |  |  |  |
| - Intervention period (Reference < 30 days) |  |  |  |  |  |
| - 30-90 days | 1.5329 | 2.2885 | 0.6698 | 0.5030 | -2.9524 - 6.0182 |
| - > 90 days | 2.0769 | 2.4460 | 0.8491 | 0.3958 | -2.7172 - 6.8709 |
| - Animal species (Reference mice) |  |  |  |  |  |
| - Rats | -0.7676 | 1.7390 | -0.4414 | 0.6589 | -4.1759 - 2.6407 |
| - Others | -1.7164 | 2.4167 | -0.7102 | 0.4776 | -6.4532 - 3.0203 |
| - Sample source (Reference blood) |  |  |  |  |  |
| - Kidney | 0.7536 | 2.2008 | 0.3424 | 0.7320 | -3.5598 - 5.0670 |
| - Liver | 0.1932 | 2.0550 | 0.0940 | 0.9251 | -3.8344 - 4.2209 |
| - Heart | -2.2892 | 3.0477 | -0.7511 | 0.4526 | -8.2625 - 3.6842 |
| - Brain | 3.5809 | 2.1682 | 1.6515 | 0.0986 | -0.6687 - 7.8305 |
| GSH |  |  |  |  |  |
| - Intervention period (Reference < 30 days) |  |  |  |  |  |
| - 30-90 days | 0.6217 | 1.1237 | 0.5533 | 0.5801 | -1.5807 - 2.8241 |
| - > 90 days | 0.7466 | 1.3525 | 0.5520 | 0.5810 | -1.9043 - 3.3974 |
| - Animal species (Reference mice) |  |  |  |  |  |
| - Rats | 0.4242 | 0.8028 | 0.5285 | 0.5972 | -1.1492 - 1.9976 |
| - Others | -1.3756 | 1.1805 | -1.1652 | 0.2439 | -3.6893 - 0.9382 |
| - Sample source (Reference blood) |  |  |  |  |  |
| - Kidney | 1.0041 | 0.9583 | 1.0477 | 0.2948 | -0.8743 - 2.8824 |
| - Liver | 1.5602 | 0.9473 | 1.6471 | 0.0995 | -0.2964 - 3.4168 |
| - Heart | 0.7720 | 1.5684 | 0.4922 | 0.6226 | -2.3020 - 3.8459 |
| - Brain | 2.8213 | 1.1399 | 2.4750 | 0.0133 | 0.5871 - 5.0556 |

**Table 2 (continued)**

|  | Coefficient | SE | Z value | *P* value | 95% CI |
| --- | --- | --- | --- | --- | --- |
| GST |  |  |  |  |  |
| - Intervention period (Reference < 30 days) |  |  |  |  |  |
| - 30-90 days | 1.6799 | 3.2129 | 0.5229 | 0.6011 | -4.6172 - 7.977 |
| - Animal species (Reference mice) |  |  |  |  |  |
| - Rats | -0.1534 | 2.7282 | -0.0562 | 0.9552 | -5.5007 - 5.1938 |
| - Sample source (Reference brain) |  |  |  |  |  |
| - Kidney | -2.4449 | 4.4802 | -0.5457 | 0.5853 | -11.2258 - 6.3361 |
| - Liver | -3.4545 | 3.2290 | -1.0698 | 0.2847 | -9.7832 - 2.8742 |
| LPO |  |  |  |  |  |
| - Intervention period (Reference < 30 days) |  |  |  |  |  |
| - 30-90 days | 0.3420 | 0.7189 | 0.4757 | 0.6343 | -1.0670 - 1.7510 |
| - > 90 days | -1.1967 | 0.8694 | -1.3764 | 0.1687 | -2.9007 - 0.5074 |
| - Animal species (Reference mice) |  |  |  |  |  |
| - Rats | -0.4183 | 0.6657 | -0.6283 | 0.5298 | -1.7230 - 0.8865 |
| - Others | 1.8370 | 0.9271 | 1.9815 | 0.0475 | 0.0200 - 3.6540 |
| - Sample source (Reference blood) |  |  |  |  |  |
| - Kidney | -0.0259 | 0.9489 | -0.0273 | 0.9782 | -1.8857 - 1.8339 |
| - Liver | 0.3575 | 0.8908 | 0.4013 | 0.6882 | -1.3886 - 2.1035 |
| - Heart | 1.6936 | 1.6510 | 1.0257 | 0.3050 | -1.5424 - 4.9295 |
| - Brain | 0.7313 | 0.9755 | 0.7496 | 0.4535 | -1.1807 - 2.6432 |
| ROS |  |  |  |  |  |
| - Intervention period (Reference < 30 days) |  |  |  |  |  |
| - 30-90 days | -0.5565 | 2.3193 | -0.2399 | 0.8104 | -5.1021 - 3.9892 |
| - > 90 days | 0.5144 | 2.8494 | 0.1805 | 0.8567 | -5.0703 - 6.0992 |
| - Animal species (Reference mice) |  |  |  |  |  |
| - Rats | -2.2948 | 1.4507 | -1.5819 | 0.1137 | -5.1381 - 0.5485 |
| - Sample source (Reference blood) |  |  |  |  |  |
| - Kidney | 0.8882 | 2.2144 | 0.4011 | 0.6883 | -3.4520 - 5.2284 |
| - Liver | -1.1578 | 1.9302 | -0.5998 | 0.5486 | -4.9409 - 2.6254 |
| - Brain | -3.1068 | 2.1300 | -1.4586 | 0.1447 | -7.2816 - 1.0679 |
| NO |  |  |  |  |  |
| - Intervention period (Reference < 30 days) |  |  |  |  |  |
| - 30-90 days | 2.0093 | 3.8155 | 0.5266 | 0.5985 | -5.4689 - 9.4874 |
| - Animal species (Reference mice) |  |  |  |  |  |
| - Rats | 2.9135 | 3.7208 | 0.7830 | 0.4336 | -4.3790 - 10.2061 |
| - Sample source (Reference blood) |  |  |  |  |  |
| - Kidney | 1.2903 | 4.8220 | 0.2676 | 0.7890 | -8.1606 - 10.7411 |
| - Liver | 5.2942 | 4.3416 | 1.2194 | 0.2227 | -3.2153 - 13.8036 |
| - Heart | 4.1357 | 5.0938 | 0.8119 | 0.4168 | -5.8479 - 14.1193 |
| - Brain | 9.5767 | 4.9762 | 1.9245 | 0.0543 | -0.1765 - 19.3299 |
